# Supplementary material for: Identification of cell type–specific correlations between ERK activity and cell viability upon treatment with ERK1/2 inhibitors
Source: PubMed Central journal article supplement — J Biol Chem. 2022 Jul 1;298(8):102226. doi: 10.1016/j.jbc.2022.102226 (PMC9358475; doi:10.1016/j.jbc.2022.102226), 2022-07-01
Supplement: mmc2.pdf [file mmc2.pdf]

## U937, SH-SY5Y, HCT-116 ERK1/2

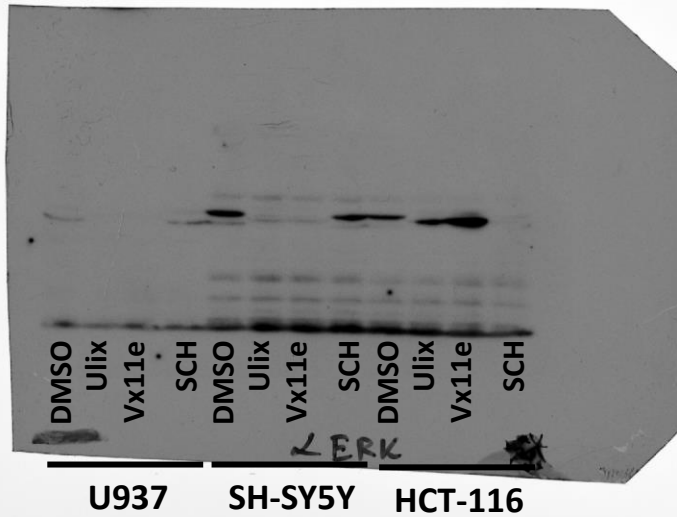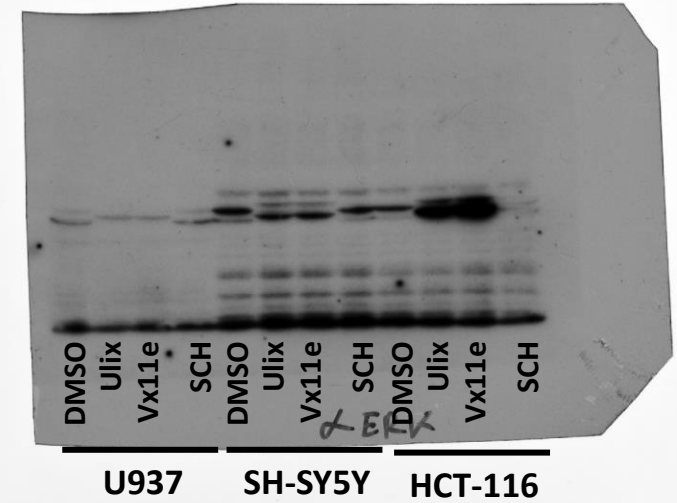

Blots obtained using custom PAG. Films were imaged on Chemidoc Bio-Rad. Two exposures (different films) are shown.

## U937, SH-SY5Y, HCT-116 pERK1/2

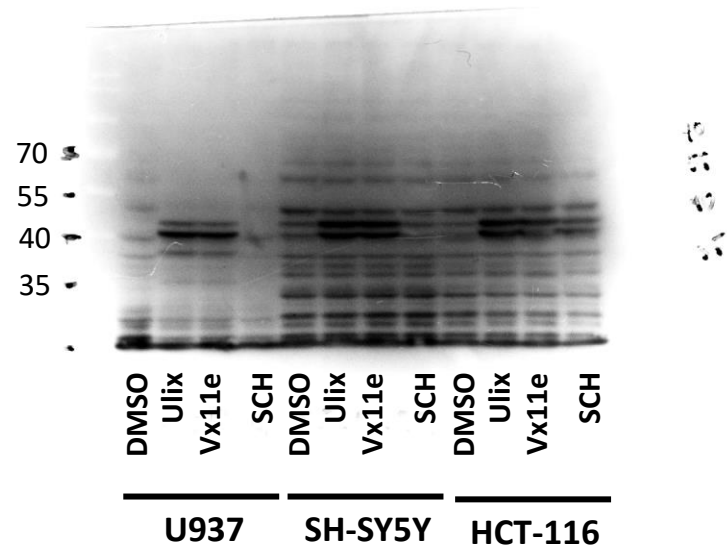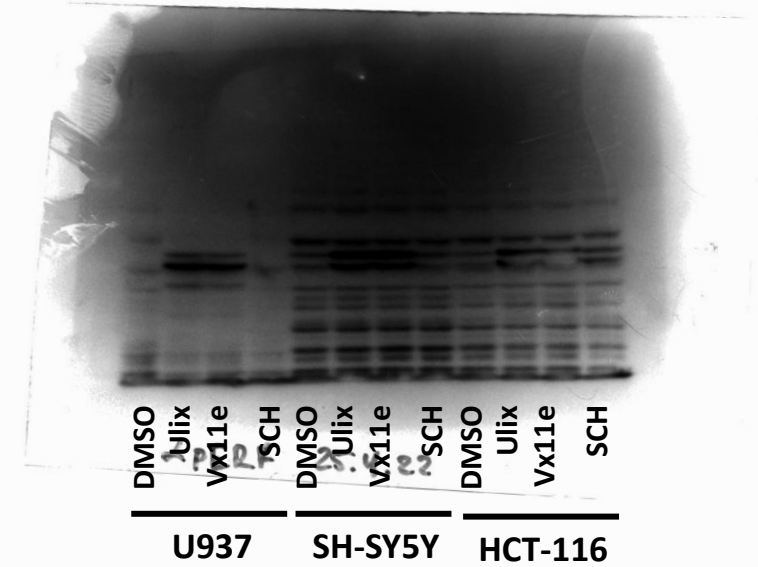

Blots obtained using custom PAG. Films were imaged on Chemidoc Bio-Rad. Two exposures (different films) are shown.

# U937, SH-SY5Y, HCT-116 pRSK1

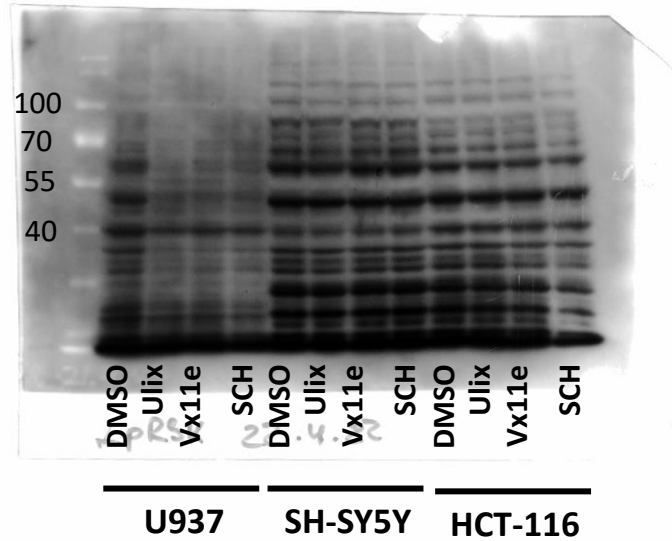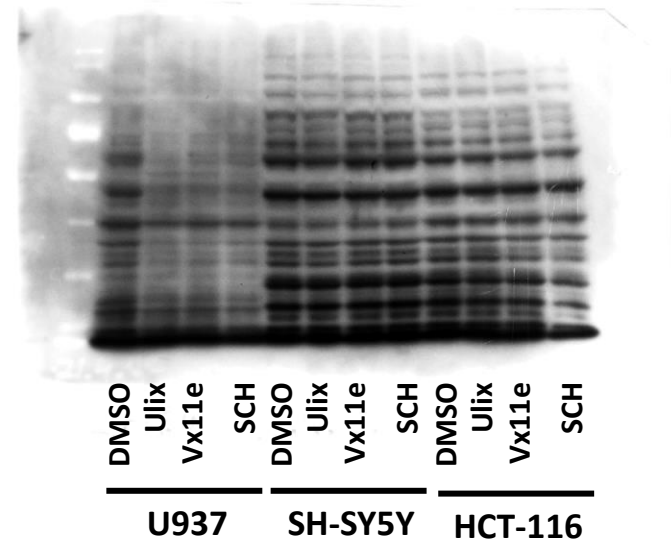

Blots obtained using custom PAG. Films were imaged on Chemidoc Bio-Rad. Two exposures (different films) are shown.

## U937, SH-SY5Y, HCT-116 b-actin

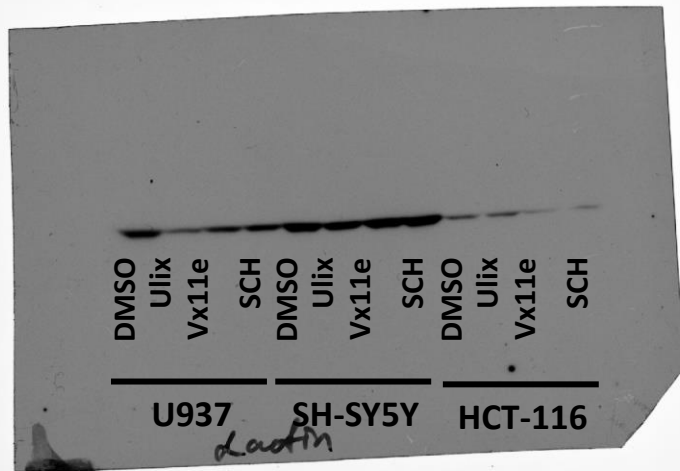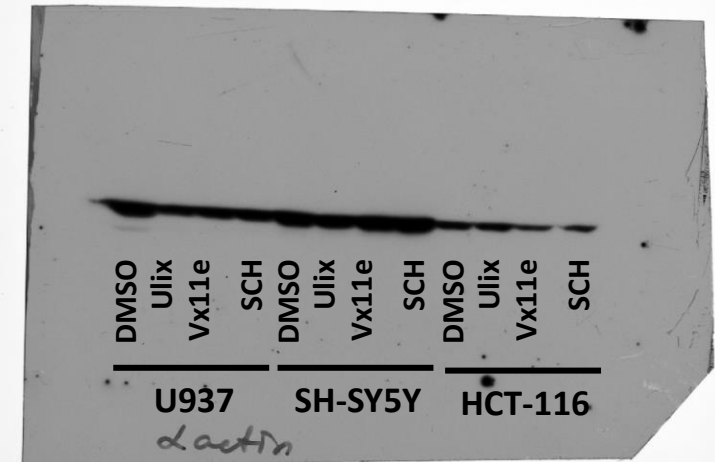

Blots obtained using custom PAG. Films were imaged on Chemidoc Bio-Rad. Two exposures (different films) are shown.

## SH-SY5Y, HCT116 pERK1/2

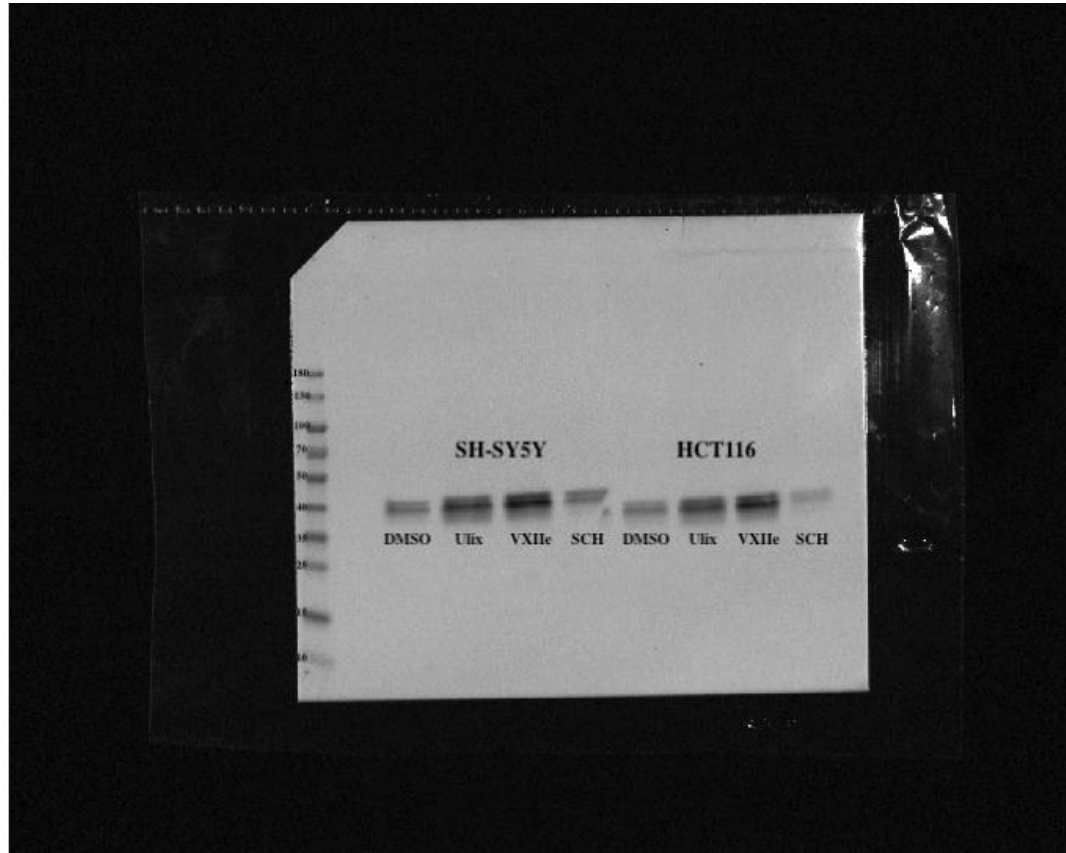

## SH-SY5Y, HCT116 ERK1/2

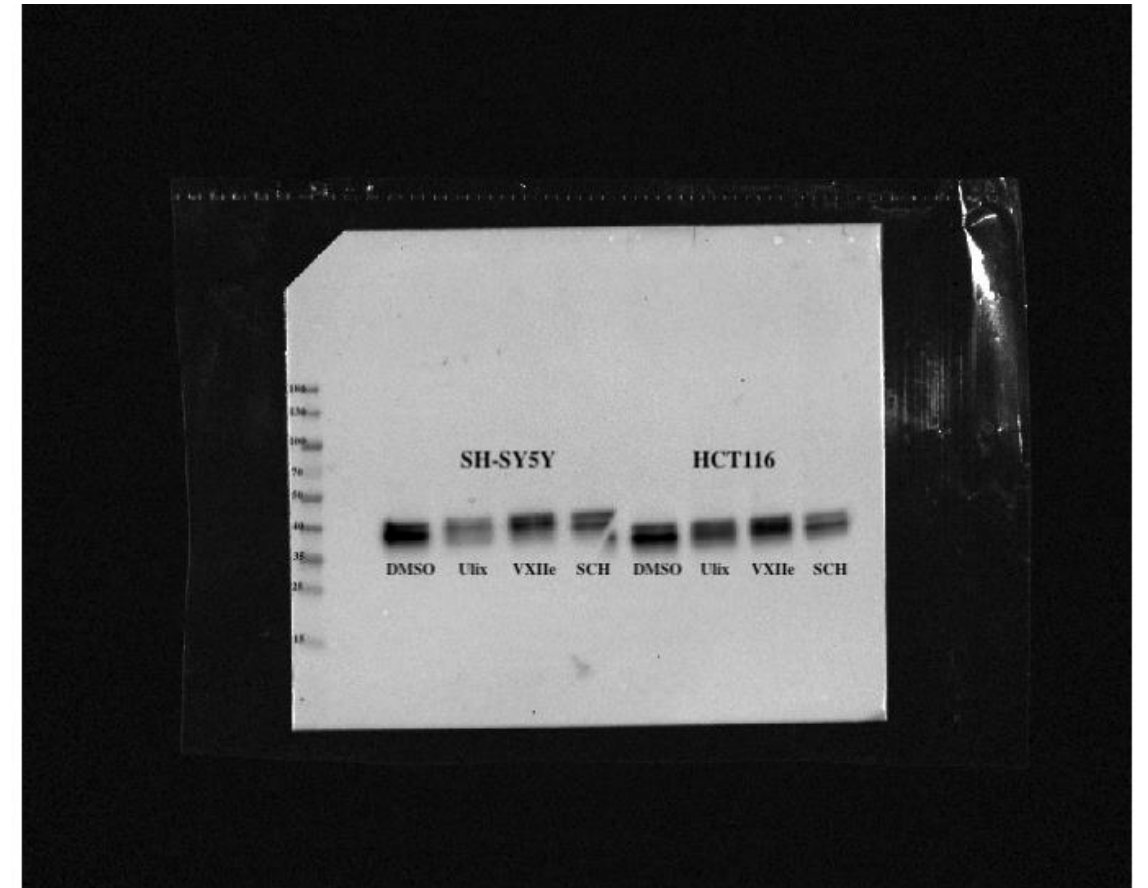

Blots obtained using Mini-protein TGX gels, BioRad Transblot turbo, and iBind. Membranes were imaged on Chemidoc Bio-Rad

## SH-SY5Y, HCT116 b-actin

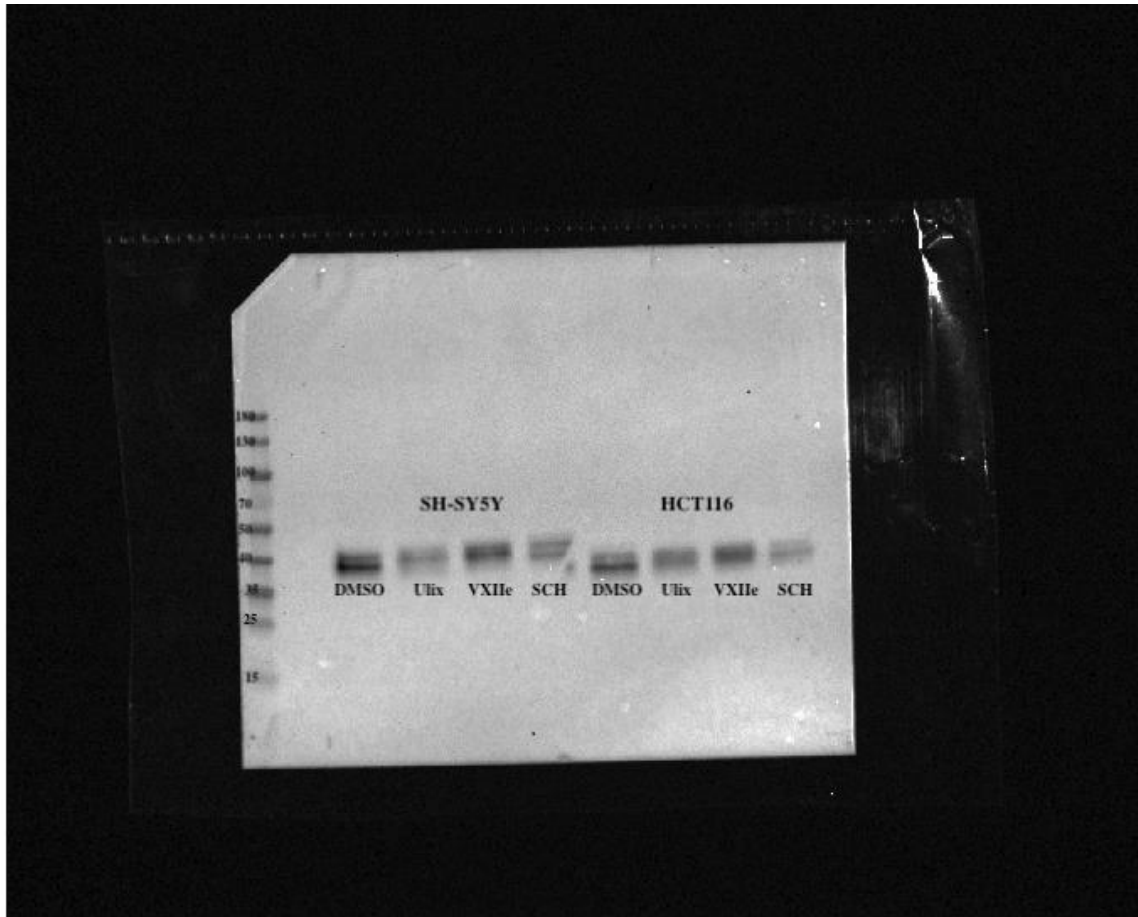

## U937 b-actin

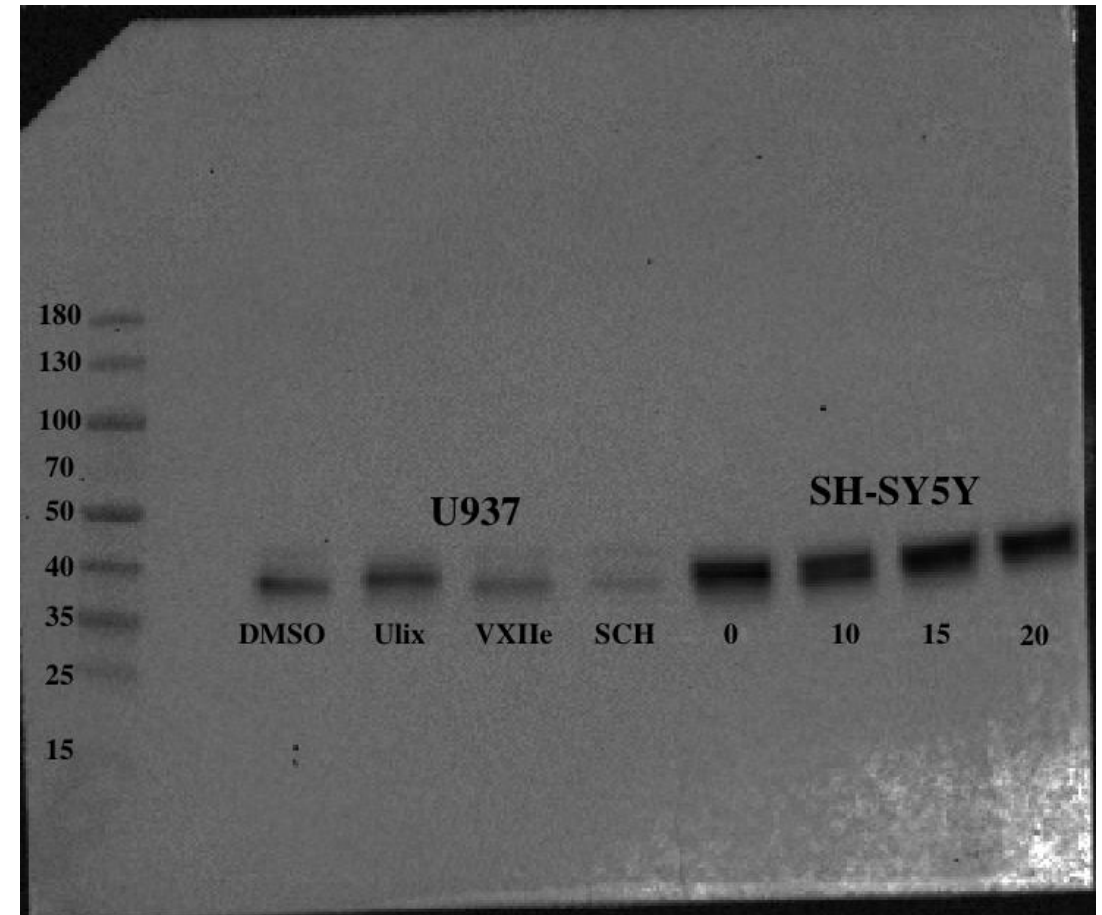

Blots obtained using Mini-protein TGX gels, BioRad Transblot turbo, and iBind. Membranes were imaged on Chemidoc Bio-Rad

## U937 pERK1/2

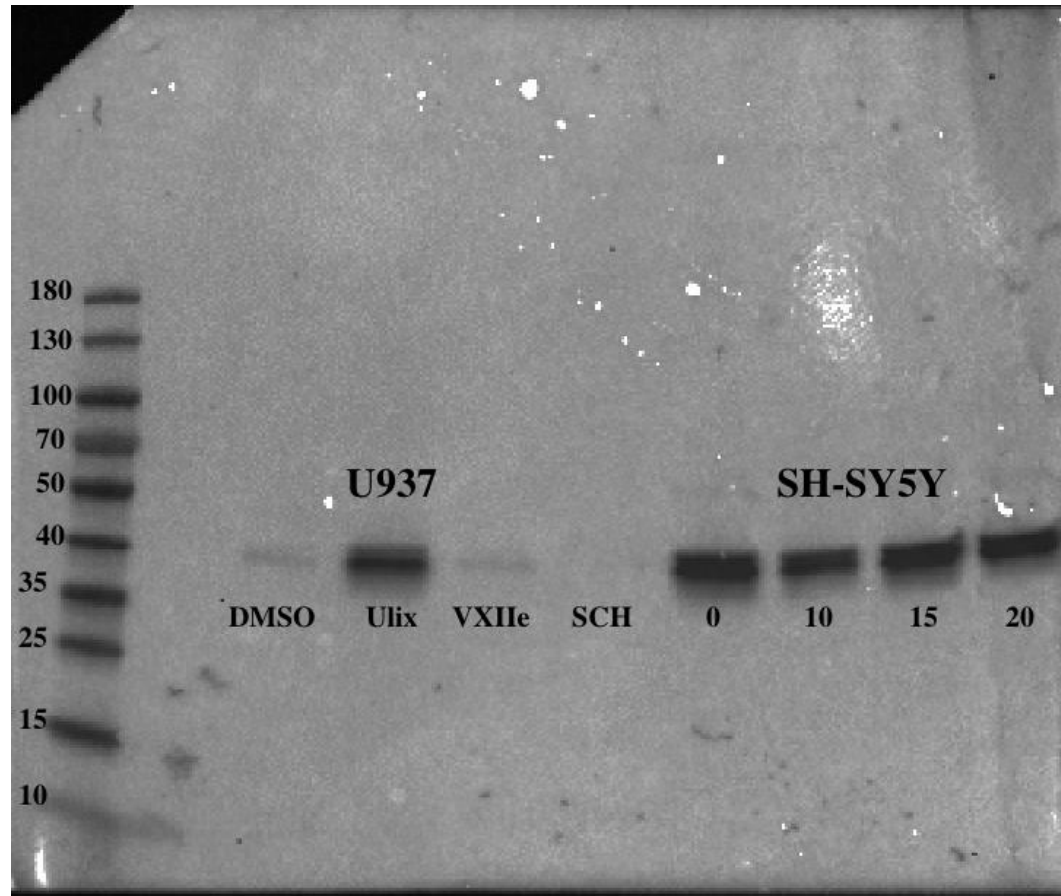

## U937 ERK1/2

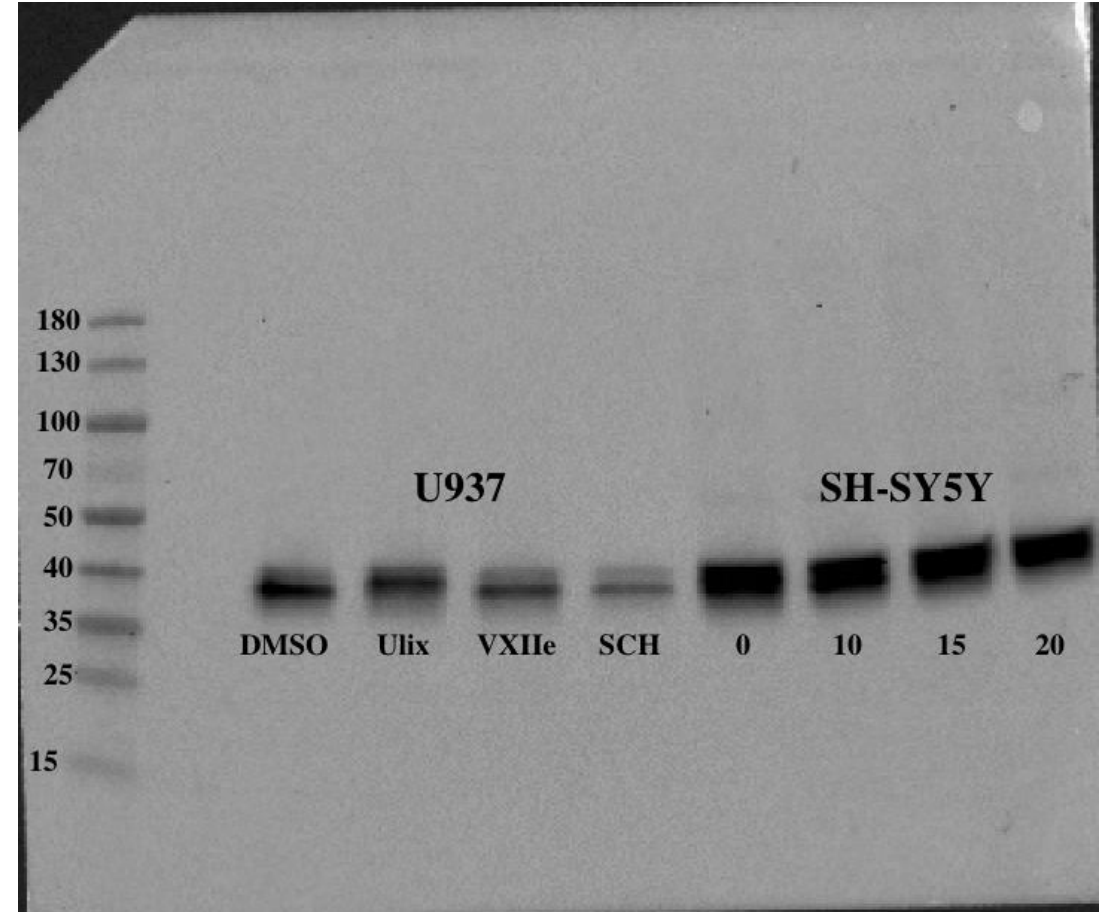

Blots obtained using Mini-protein TGX gels, BioRad Transblot turbo, and iBind. Membranes were imaged on Chemidoc Bio-Rad

## SH-SY5Y,U937 pRSK1

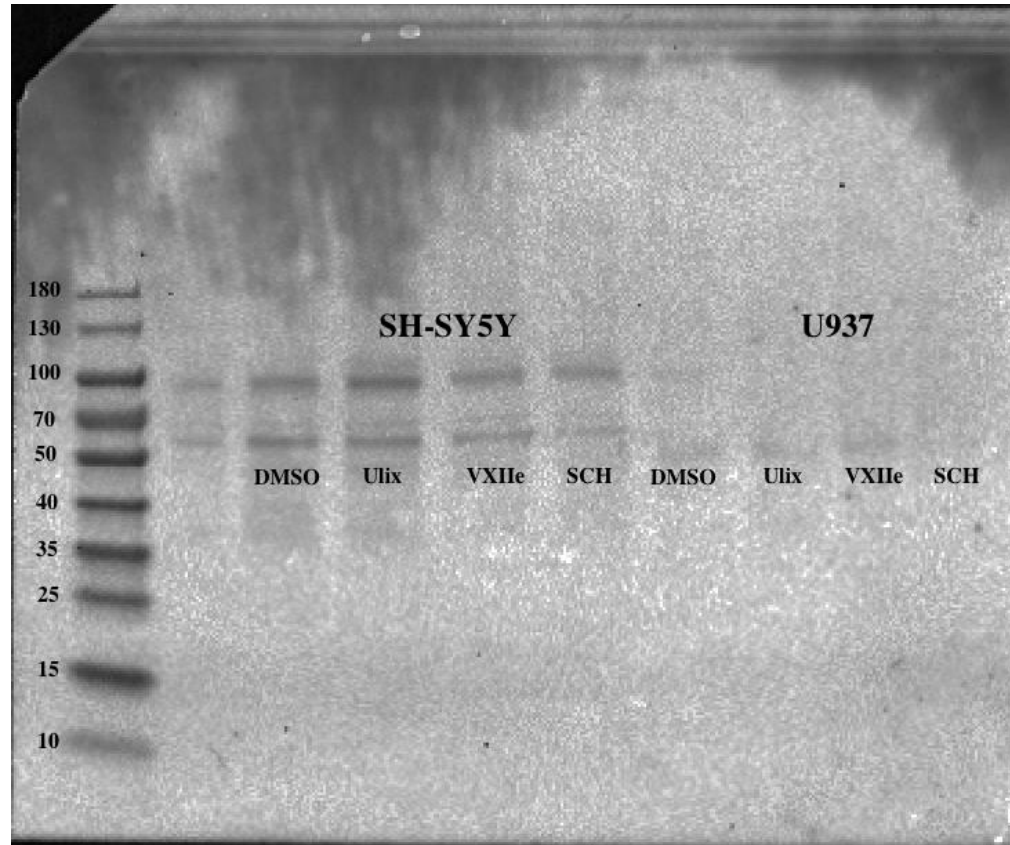

## SH-SY5Y,U937 b-actin

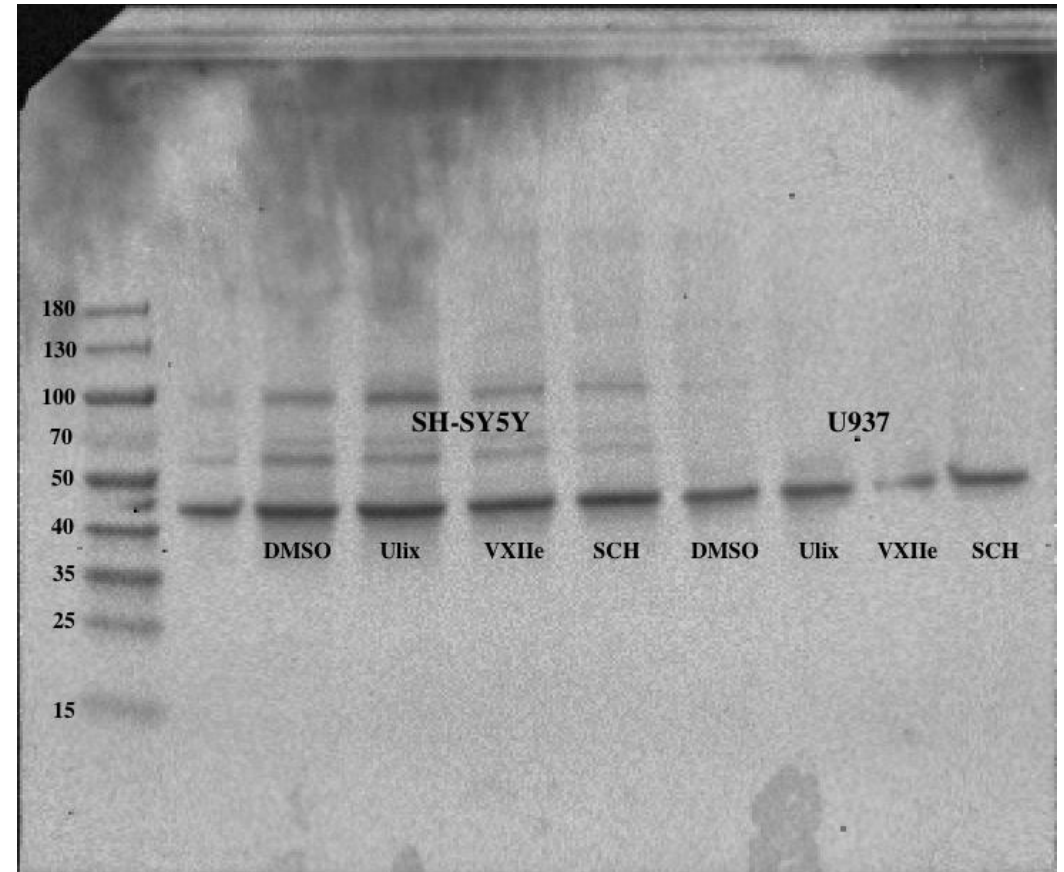

Blots obtained using Mini-protein TGX gels, BioRad Transblot turbo, and iBind. Membranes were imaged on Chemidoc Bio-Rad

## HCT116 pRSK1

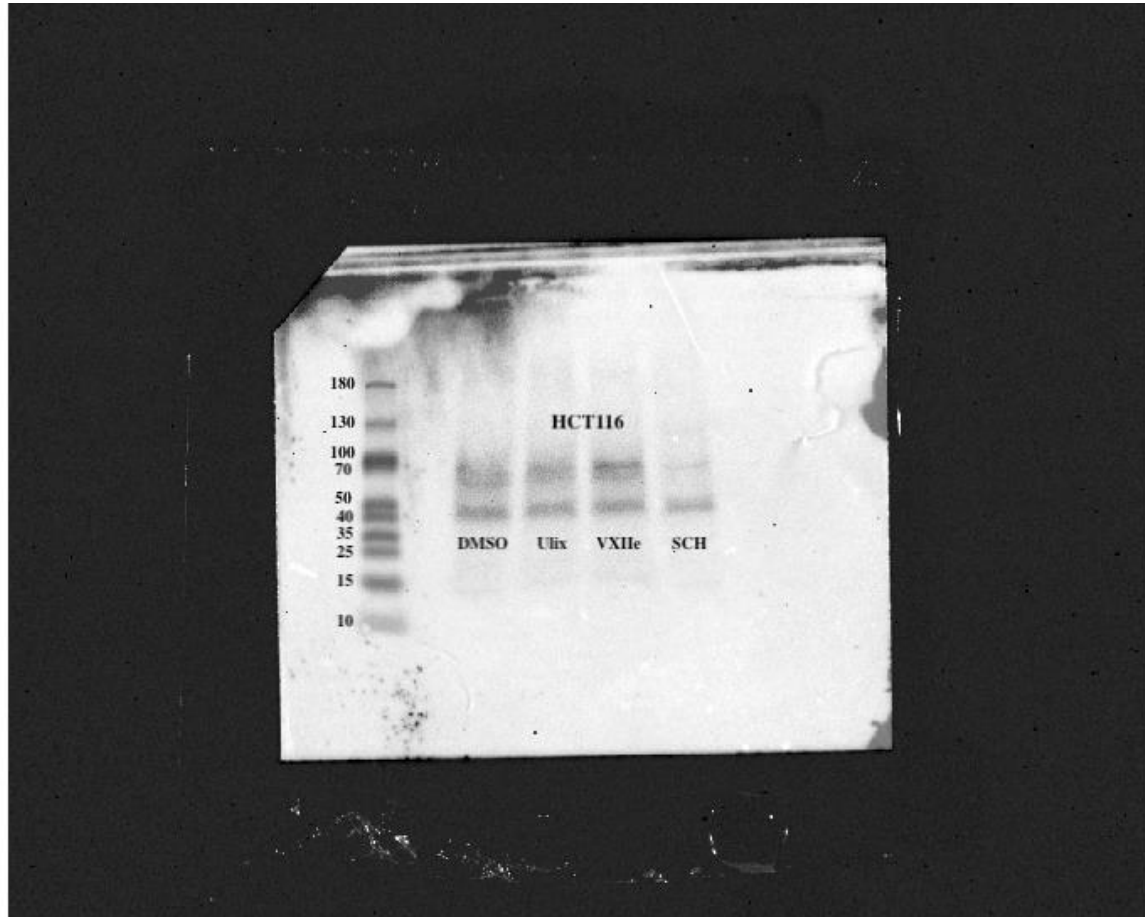

## HCT116 b-actin

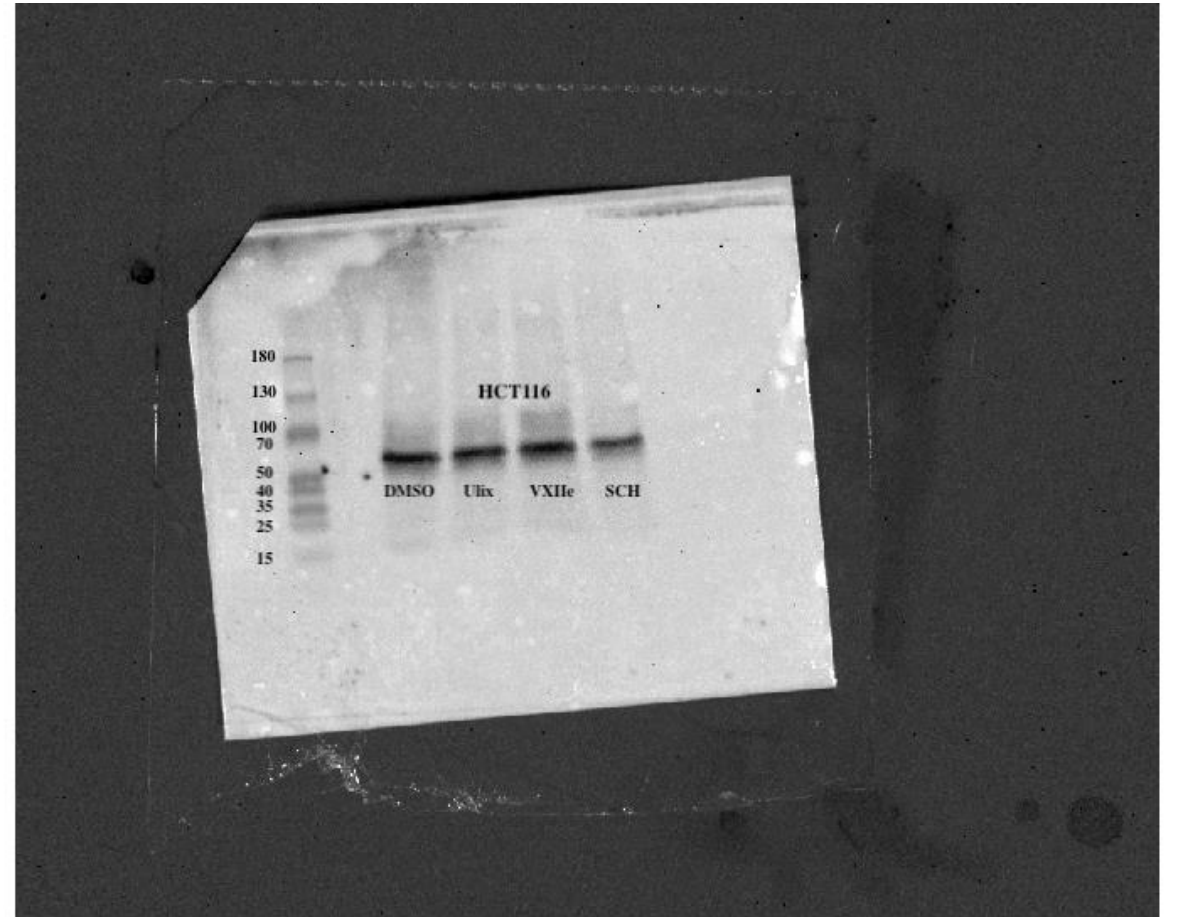

Blots obtained using Mini-protein TGX gels, BioRad Transblot turbo, and iBind. Membranes were imaged on Chemidoc Bio-Rad
